# Supplementary material
Source: PubMed Central journal article supplement (PMC10484169)
Supplement: noad036_suppl_supplementary_material.pdf [file noad036_suppl_supplementary_material.pdf]

A

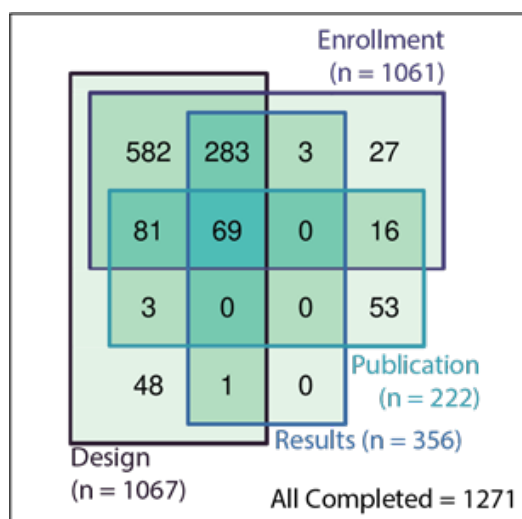

B

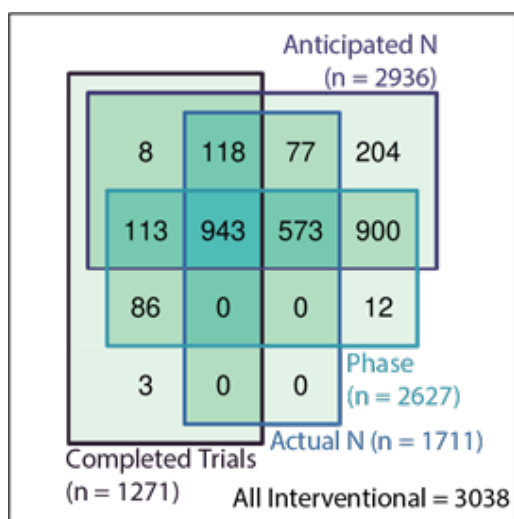

C

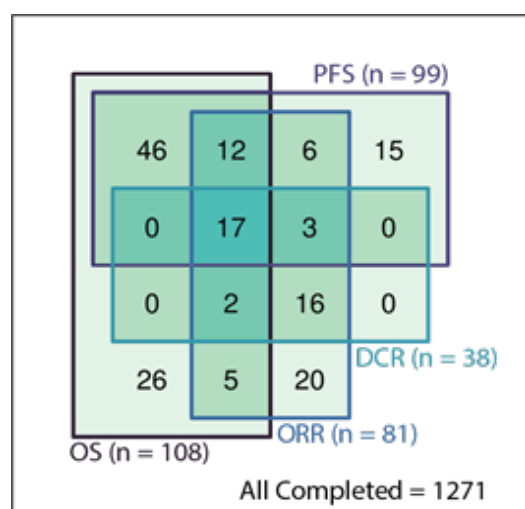

D

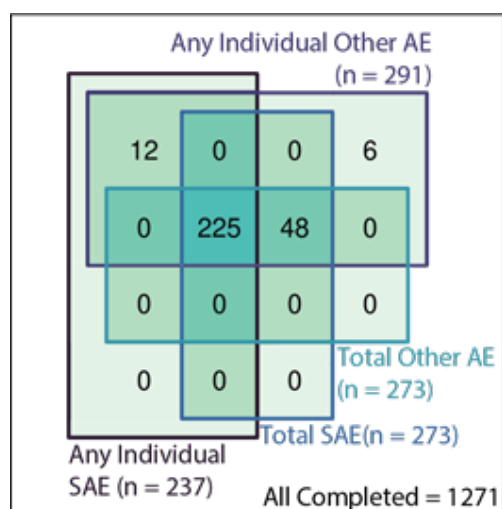

E

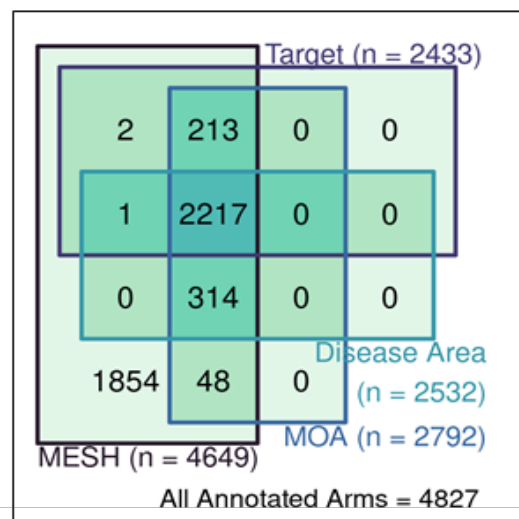

**Supplementary Figure S1.** Venn diagrams depicting data availability for (A) Main design elements, planned enrollment, publication reporting, and results reporting; (B) Detailed enrollment; (C) Reported results by planned outcome (DCR=disease control rate, defined as ORR + stable disease rate); (D) Reported adverse event results; (E) Target, mechanism of action, and disease area of interventions. The outer square indicates the set of trials or arms that are pertinent to the question. Each individual square indicates the subset of the trials/arms with indicated data element availability. The intersection among the squares indicates the number of trials/arms that have information on each of the questions represented by the overlapping squares.

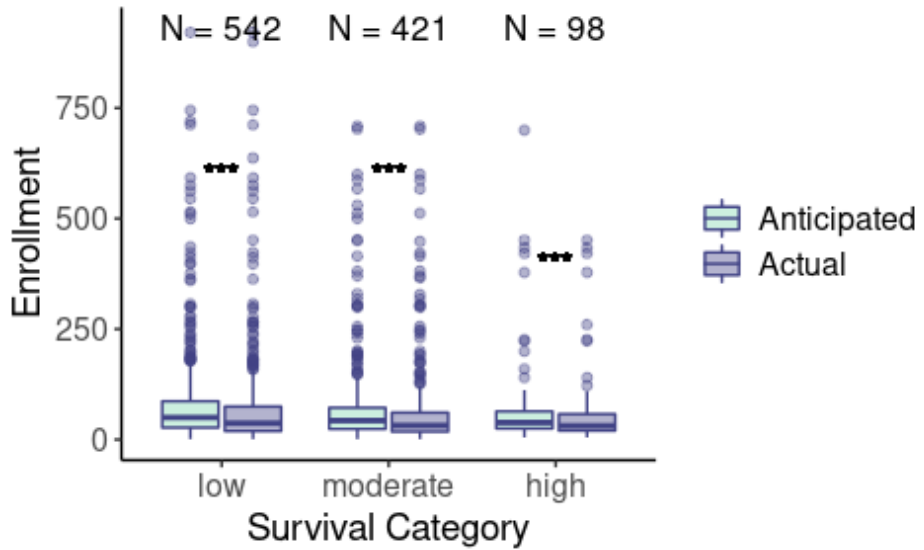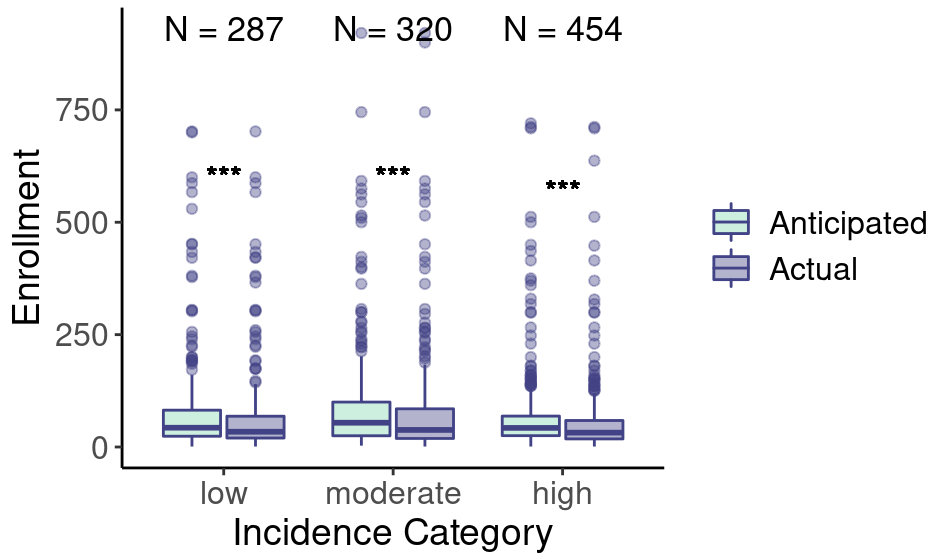

**Supplementary Figure S2.** Comparison of target enrollment with actual enrollment for completed trials by survival category and incidence categories of conditions studied using one-sided Wilcoxon tests. Significance levels for  $p\text{-adj}$ :  $0 < *** \leq 0.001 \leq ** \leq 0.01 \leq * \leq 0.05$ .

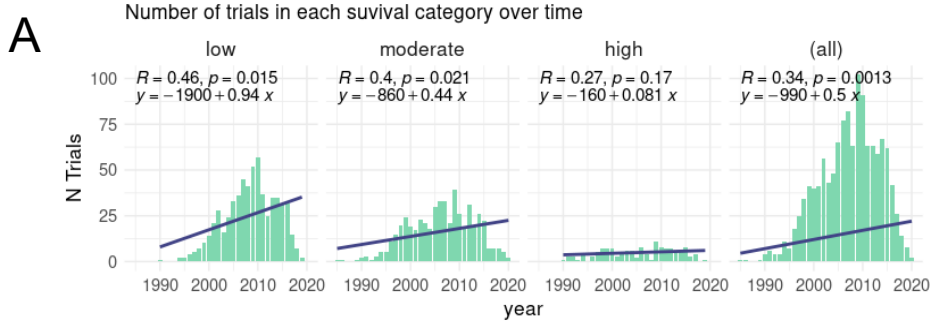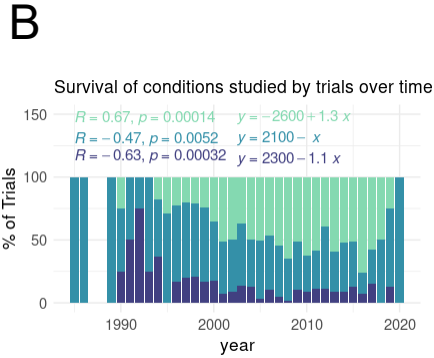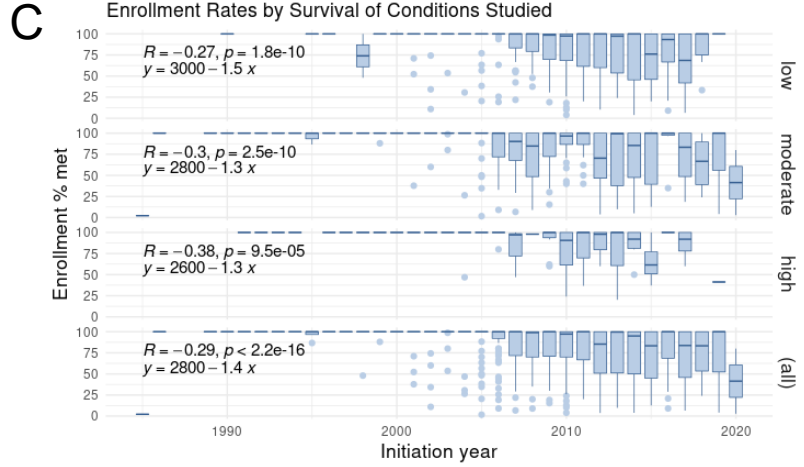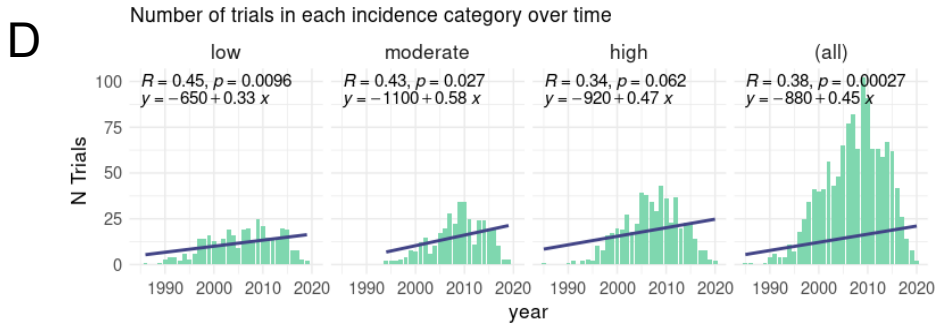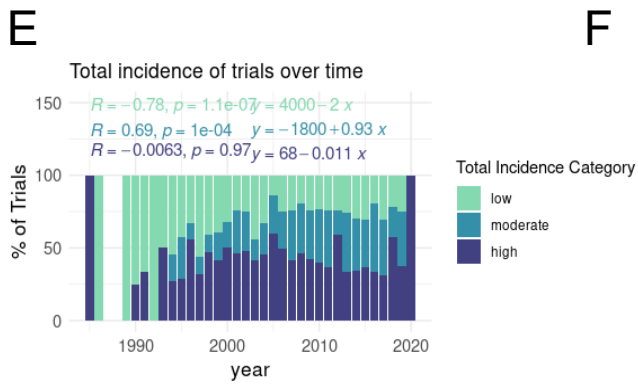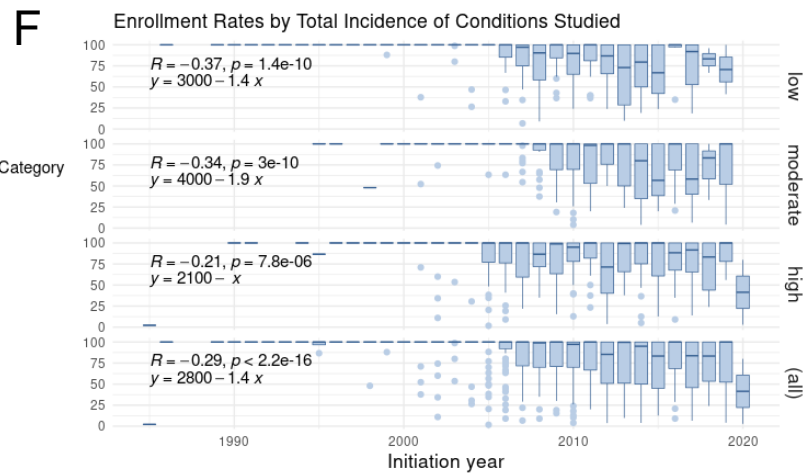

**Supplementary Figure S3. Trial Enrollment and Accrual.** Number and proportion of trials initiated each year, grouped by total incidence (**A,B**) and prognosis (**D,E**) of conditions studied. Percent of Enrollment goal met by trials each year, grouped by incidence (**C**) and prognosis (**F**) of condition studied.

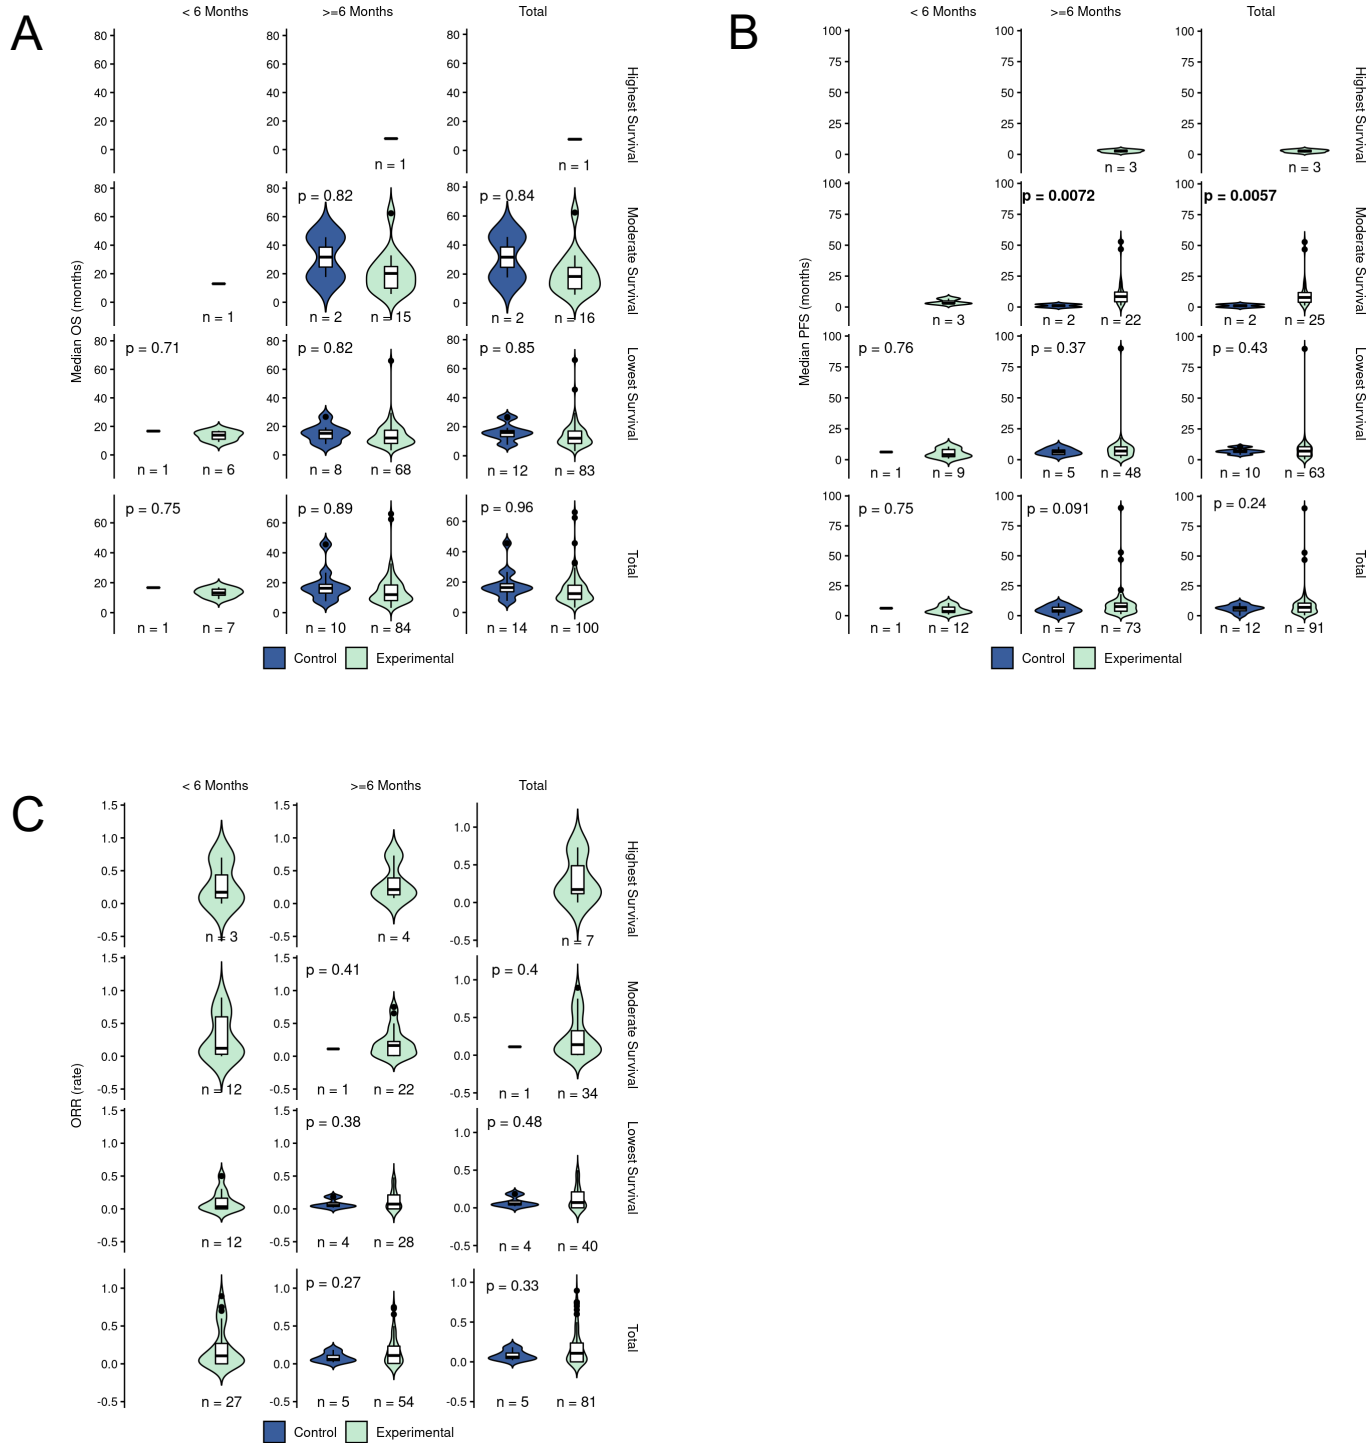

**Supplementary Figure S4.** Overview of reported efficacy and toxicity, stratified by survival category of condition and timeframe of outcome collection (>=6 or <6 months). Median responses were compared for experimental and control arms using Wilcoxon one sided test for trials reporting either or both experimental and control arm responses. Raw one-sided p-values are presented. Margin totals include trials missing annotations for timeframe and survival category. **A.** OS, **B.** PFS, **C.** ORR

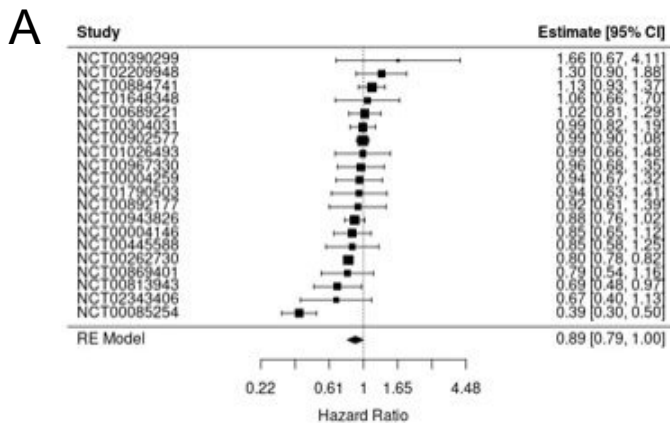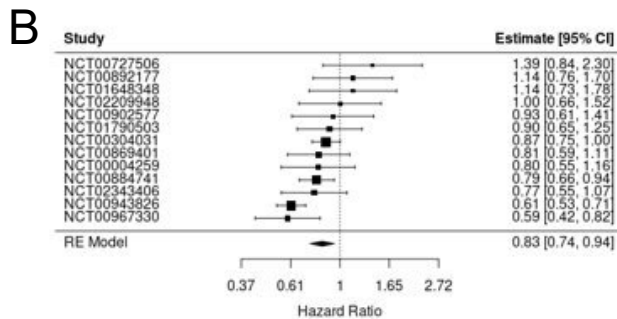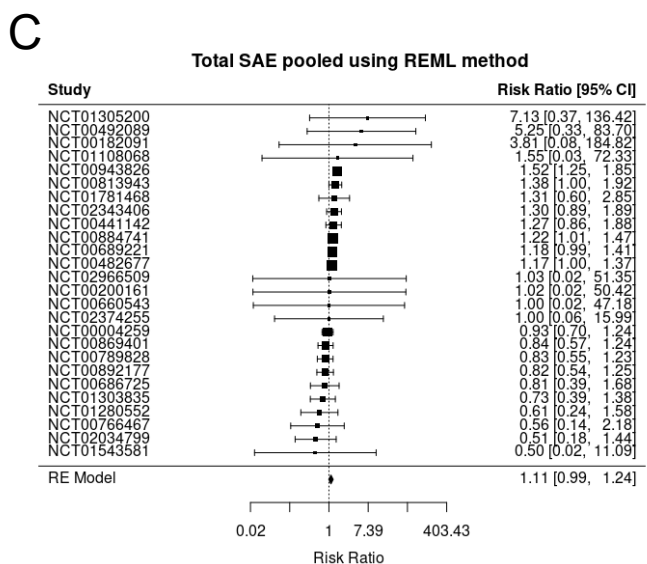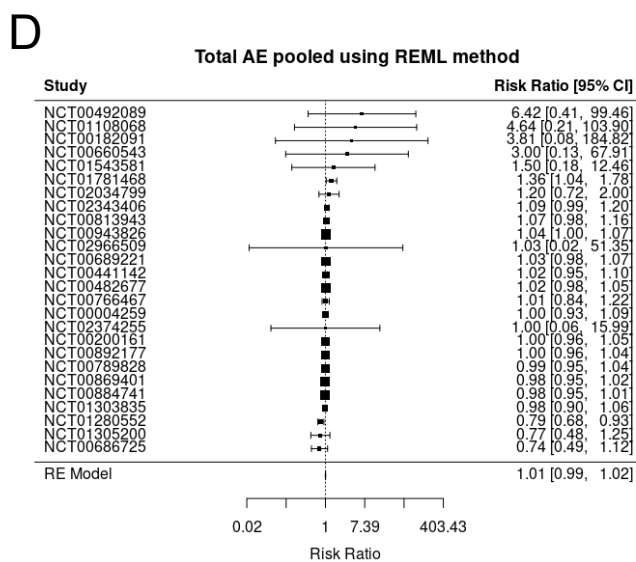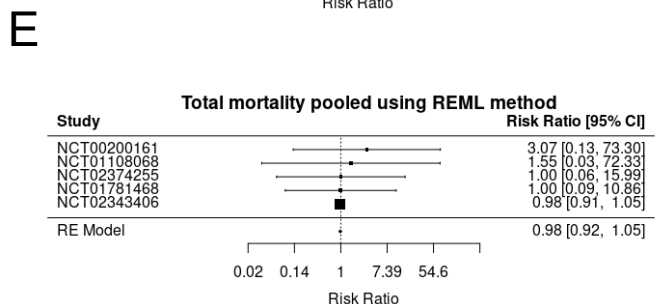

**Supplementary Figure S5.** Pooled Hazard Ratios and Intervention Toxicity Risk Ratios. **A.** OS and **B.** PFS outcomes from data reported by trials. **C.** Total Serious Adverse Events, **D.** Total Other Adverse Events, and **E.** Total All-Cause Mortality. Risk Ratios derived from studies reporting data for matched control and experimental arms.

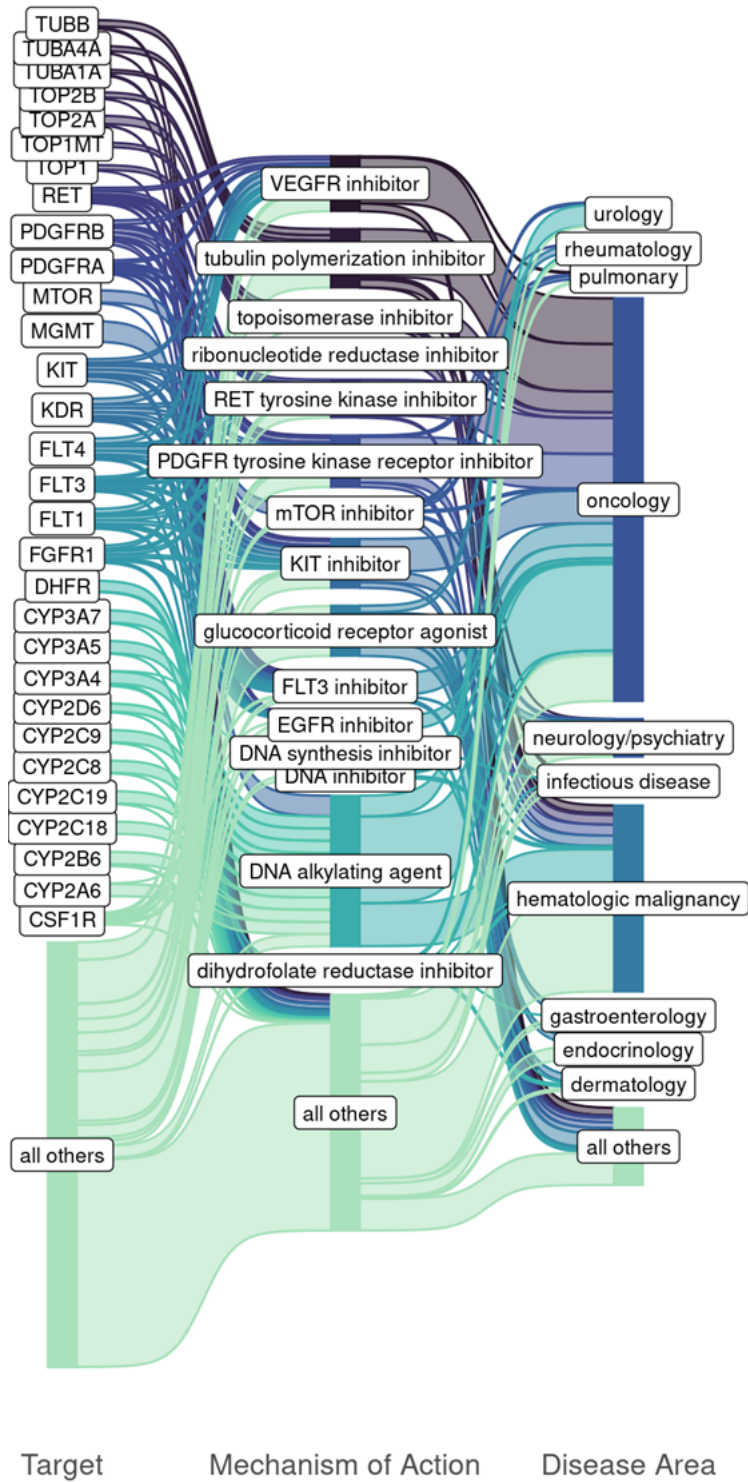

**Supplementary Figure S6.** Most frequently studied interventions and their mechanisms of actions and disease areas obtained through annotations using the Drug Repurposing Hub database.

**Supplementary Table S1.** Search term derived from WHO classification of malignant CNS tumors to query neuro-oncology trials, by excluding non-malignant conditions as indicated by ICDO-O codes).

\*To exclude pediatric-targeted trials, we used the following parameter in our RPostgreSQL query: `calculated_values.maximum_age_num <= 18`.

**Term\***

Astrocytoma  
Astrocytic Tumor  
Glioblastoma  
GBM  
Gliosarcoma  
Glioma  
Oligodendroglioma  
Oligodendroglial Tumor  
Oligoastrocytoma  
Oligoastrocytic Tumor  
Astrocytoma  
Xanthoastrocytoma  
Ependymoma  
Ependymal Tumor  
Astroblastoma  
Choroid Plexus Papilloma  
Choroid Plexus Carcinoma  
Choroid Plexus Tumor  
Neuronal Tumor  
Neuronal-Glial Tumor  
Ganglioglioma  
Glioneuronal Tumor  
Neurocytoma  
Liponeurocytoma  
Paranglioma  
Tumor of the Pineal Region  
Pineal Region Tumor  
Pineal Tumor  
Pineocytoma  
Pineal Parenchymal Tumor  
Pineoblastoma  
Medulloblastoma  
Melanotic Schwannoma  
Nerve Sheath Tumor  
Meningioma  
Meningeal Tumor  
Tumor of Meninges  
Meningeal Melanocytoma

Meningeal Melanoma  
Meningeal Melanomatosis  
Lymphoma of the Central Nervous System  
Lymphoma of the CNS  
CNS Lymphoma  
Central Nervous System Lymphoma  
Lymphoma of the Dura  
Tumor of the Sellar Region  
Craniopharyngioma  
Tumor of Cranial and Spinal Nerves  
Tumor of Cranial Nerve  
Tumor of Spinal Nerve  
Cranial and Spinal Nerve Tumor  
Cranial Nerve Tumor  
Spinal Nerve Tumor  
Pituicytoma  
Pituitary Tumor  
Tumor of Neuroepithelial Tissue  
Tumor of the Neuroepithelial Tissue  
Neuroepithelial Tumor  
Chordoma  
Germ Cell Tumor  
Germinoma  
Embryonal Carcinoma  
Yolk Sac Tumor  
Choriocarcinoma  
Teratoma  
Primary Central Nervous System Sarcoma  
Primary CNS Sarcoma  
Sarcoma of the Central Nervous System  
Sarcoma of the CNS  
PNET  
Neuro-ectodermal Tumor  
Neuroectodermal Tumor  
Gliomatosis  
Hemangiopericytoma  
DIPG  
Diffuse Intrinsic Pontine Glioma  
Primary CNS Tumor  
Primary Central Nervous System Tumor  
Astrocytic Neoplasm  
Oligodendroglial Neoplasm  
Oligoastrocytic Neoplasm



Ependymal Neoplasm  
Neuronal Neoplasm  
Neuronal-Glial Neoplasm  
Glioneuronal Neoplasm  
Neoplasm of the Pineal Region  
Pineal Neoplasm  
Pineal Region Neoplasm  
Pineal Parenchymal Neoplasm  
Nerve Sheath Neoplasm  
Meningeal Neoplasm  
Neoplasm of Meninges  
Neoplasm of the Sellar Region  
Neoplasm of Cranial and Spinal Nerves  
Neoplasm of Cranial Nerve  
Neoplasm of Spinal Nerve  
Cranial and Spinal Nerve Neoplasm  
Cranial Nerve Neoplasm  
Spinal Nerve Neoplasm  
Pituitary Neoplasm  
Neoplasm of Neuroepithelial Tissue  
Neoplasm of the Neuroepithelial Tissue  
Neuroepithelial Neoplasm  
Germ Cell Neoplasm  
Yolk Sac Neoplasm  
Primitive Neuro-Ectodermal Neoplasms  
Primitive Neuroectodermal Neoplasms  
Primary CNS Neoplasm  
Primary Central Nervous System Neoplasm  
Astrocytic Cancer  
Oligodendroglial Cancer  
Oligoastrocytic Cancer  
Ependymal Cancer  
Neuronal Cancer  
Neuronal-Glial Cancer  
Glioneuronal Cancer  
Cancer of the Pineal Region  
Pineal Cancer  
Pineal Region Cancer  
Pineal Parenchymal Cancer  
Nerve Sheath Cancer  
Meningeal Cancer  
Cancer of Meninges  
Cancer of the Sellar Region

Cancer of Cranial and Spinal Nerves  
Cancer of Cranial Nerve  
Cancer of Spinal Nerve  
Cranial and Spinal Nerve Cancer  
Cranial Nerve Cancer  
Spinal Nerve Cancer  
Pituitary Cancer  
Cancer of Neuroepithelial Tissue  
Cancer of the Neuroepithelial Tissue  
Neuroepithelial Cancer  
Germ Cell Cancer  
Yolk Sac Cancer  
Primitive Neuro-Ectodermal Cancers  
Primitive Neuroectodermal Cancers  
Primary CNS Cancer  
Primary Central Nervous System Cancer

**Supplementary Table S2.** MeSH terms under “Neoplasm by Site”. These terms were used to search for general oncology trials in the clinicaltrials.gov registry.

### Neoplasms by Site [C04.588]

- Abdominal Neoplasms [C04.588.033]
  - Peritoneal Neoplasms [C04.588.033.513]
  - Retroperitoneal Neoplasms [C04.588.033.731]
  - Sister Mary Joseph's Nodule [C04.588.033.740]
- Anal Gland Neoplasms [C04.588.083]
- Bone Neoplasms [C04.588.149]
  - Adamantinoma [C04.588.149.030]
  - Femoral Neoplasms [C04.588.149.276]
  - Skull Neoplasms [C04.588.149.721]
    - Jaw Neoplasms [C04.588.149.721.450]
      - Mandibular Neoplasms [C04.588.149.721.450.583]
      - Maxillary Neoplasms [C04.588.149.721.450.601]
      - Palatal Neoplasms [C04.588.149.721.450.692]
    - Nose Neoplasms [C04.588.149.721.600]
    - Orbital Neoplasms [C04.588.149.721.656]
    - Skull Base Neoplasms [C04.588.149.721.828]
  - Spinal Neoplasms [C04.588.149.828]
- Breast Neoplasms [C04.588.180]
  - Breast Carcinoma In Situ [C04.588.180.130]
  - Breast Neoplasms, Male [C04.588.180.260]
  - Carcinoma, Ductal, Breast [C04.588.180.390]
  - Carcinoma, Lobular [C04.588.180.437]
  - Hereditary Breast and Ovarian Cancer Syndrome [C04.588.180.483]
  - Inflammatory Breast Neoplasms [C04.588.180.576]
  - Triple Negative Breast Neoplasms [C04.588.180.788]
  - Unilateral Breast Neoplasms [C04.588.180.800]
- Digestive System Neoplasms [C04.588.274]
  - Biliary Tract Neoplasms [C04.588.274.120]
    - Bile Duct Neoplasms [C04.588.274.120.250]
      - Common Bile Duct Neoplasms [C04.588.274.120.250.250]
    - Gallbladder Neoplasms [C04.588.274.120.401]
  - Gastrointestinal Neoplasms [C04.588.274.476]
    - Esophageal Neoplasms [C04.588.274.476.205]
      - Esophageal Squamous Cell Carcinoma [C04.588.274.476.205.500]
    - Intestinal Neoplasms [C04.588.274.476.411]
      - Cecal Neoplasms [C04.588.274.476.411.184]
        - Appendiceal Neoplasms [C04.588.274.476.411.184.290]
      - Colorectal Neoplasms [C04.588.274.476.411.307]
        - Adenomatous Polyposis Coli [C04.588.274.476.411.307.089]
          - Gardner Syndrome [C04.588.274.476.411.307.089.393]
        - Colonic Neoplasms [C04.588.274.476.411.307.180]
          - Colitis-Associated Neoplasms [C04.588.274.476.411.307.180.400]

- [Sigmoid Neoplasms \[C04.588.274.476.411.307.180.800\]](#)
    - [Colorectal Neoplasms, Hereditary Nonpolyposis \[C04.588.274.476.411.307.190\]](#)
    - [Rectal Neoplasms \[C04.588.274.476.411.307.790\]](#)
      - [Anus Neoplasms \[C04.588.274.476.411.307.790.040\]](#)
        - [Anal Gland Neoplasms \[C04.588.274.476.411.307.790.040.040\]](#)
      - [Duodenal Neoplasms \[C04.588.274.476.411.445\]](#)
      - [Ileal Neoplasms \[C04.588.274.476.411.501\]](#)
      - [Jejunal Neoplasms \[C04.588.274.476.411.523\]](#)
    - [Stomach Neoplasms \[C04.588.274.476.767\]](#)
  - [Liver Neoplasms \[C04.588.274.623\]](#)
    - [Adenoma, Liver Cell \[C04.588.274.623.040\]](#)
    - [Carcinoma, Hepatocellular \[C04.588.274.623.160\]](#)
    - [Liver Neoplasms, Experimental \[C04.588.274.623.460\]](#)
  - [Pancreatic Neoplasms \[C04.588.274.761\]](#)
    - [Adenoma, Islet Cell \[C04.588.274.761.249\]](#)
      - [Insulinoma \[C04.588.274.761.249.500\]](#)
    - [Carcinoma, Islet Cell \[C04.588.274.761.500\]](#)
      - [Gastrinoma \[C04.588.274.761.500.124\]](#)
      - [Glucagonoma \[C04.588.274.761.500.249\]](#)
      - [Somatostatinoma \[C04.588.274.761.500.500\]](#)
      - [Vipoma \[C04.588.274.761.500.750\]](#)
    - [Carcinoma, Pancreatic Ductal \[C04.588.274.761.750\]](#)
    - [Pancreatic Intraductal Neoplasms \[C04.588.274.761.875\]](#)
  - [Peritoneal Neoplasms \[C04.588.274.780\]](#)
- [Endocrine Gland Neoplasms \[C04.588.322\]](#)
  - [Adrenal Gland Neoplasms \[C04.588.322.078\]](#)
    - [Adrenal Cortex Neoplasms \[C04.588.322.078.265\]](#)
  - [Multiple Endocrine Neoplasia \[C04.588.322.400\]](#)
    - [Multiple Endocrine Neoplasia Type 1 \[C04.588.322.400.500\]](#)
    - [Multiple Endocrine Neoplasia Type 2a \[C04.588.322.400.505\]](#)
    - [Multiple Endocrine Neoplasia Type 2b \[C04.588.322.400.510\]](#)
  - [Ovarian Neoplasms \[C04.588.322.455\]](#)
    - [Carcinoma, Ovarian Epithelial \[C04.588.322.455.199\]](#)
    - [Granulosa Cell Tumor \[C04.588.322.455.398\]](#)
    - [Hereditary Breast and Ovarian Cancer Syndrome \[C04.588.322.455.431\]](#)
    - [Luteoma \[C04.588.322.455.464\]](#)
    - [Meigs Syndrome \[C04.588.322.455.531\]](#)
    - [Sertoli-Leydig Cell Tumor \[C04.588.322.455.648\]](#)
    - [Thecoma \[C04.588.322.455.765\]](#)
  - [Pancreatic Neoplasms \[C04.588.322.475\]](#)
    - [Adenoma, Islet Cell \[C04.588.322.475.249\]](#)
      - [Insulinoma \[C04.588.322.475.249.500\]](#)
    - [Carcinoma, Islet Cell \[C04.588.322.475.500\]](#)
      - [Gastrinoma \[C04.588.322.475.500.124\]](#)

- [Glucagonoma \[C04.588.322.475.500.249\]](#)
    - [Somatostatinoma \[C04.588.322.475.500.500\]](#)
    - [Vipoma \[C04.588.322.475.500.750\]](#)
    - [Carcinoma, Pancreatic Ductal \[C04.588.322.475.750\]](#)
    - [Pancreatic Intraductal Neoplasms \[C04.588.322.475.875\]](#)
  - [Paraneoplastic Endocrine Syndromes \[C04.588.322.490\]](#)
  - [Parathyroid Neoplasms \[C04.588.322.525\]](#)
  - [Pituitary Neoplasms \[C04.588.322.609\]](#)
    - [ACTH-Secreting Pituitary Adenoma \[C04.588.322.609.145\]](#)
      - [Nelson Syndrome \[C04.588.322.609.145.500\]](#)
    - [Growth Hormone-Secreting Pituitary Adenoma \[C04.588.322.609.292\]](#)
    - [Prolactinoma \[C04.588.322.609.792\]](#)
  - [Testicular Neoplasms \[C04.588.322.762\]](#)
    - [Sertoli-Leydig Cell Tumor \[C04.588.322.762.500\]](#)
      - [Leydig Cell Tumor \[C04.588.322.762.500.249\]](#)
      - [Sertoli Cell Tumor \[C04.588.322.762.500.500\]](#)
  - [Thyroid Neoplasms \[C04.588.322.894\]](#)
    - [Thyroid Cancer, Papillary \[C04.588.322.894.400\]](#)
    - [Thyroid Nodule \[C04.588.322.894.800\]](#)
- [Eye Neoplasms \[C04.588.364\]](#)
    - [Conjunctival Neoplasms \[C04.588.364.235\]](#)
    - [Intraocular Lymphoma \[C04.588.364.447\]](#)
    - [Orbital Neoplasms \[C04.588.364.659\]](#)
    - [Paraneoplastic Syndromes, Ocular \[C04.588.364.738\]](#)
    - [Retinal Neoplasms \[C04.588.364.818\]](#)
      - [Retinoblastoma \[C04.588.364.818.760\]](#)
    - [Uveal Neoplasms \[C04.588.364.978\]](#)
      - [Choroid Neoplasms \[C04.588.364.978.223\]](#)
      - [Iris Neoplasms \[C04.588.364.978.400\]](#)
  - [Head and Neck Neoplasms \[C04.588.443\]](#)
    - [Squamous Cell Carcinoma of Head and Neck \[C04.588.443.177\]](#)
    - [Esophageal Neoplasms \[C04.588.443.353\]](#)
      - [Esophageal Squamous Cell Carcinoma \[C04.588.443.353.500\]](#)
    - [Facial Neoplasms \[C04.588.443.392\]](#)
      - [Eyelid Neoplasms \[C04.588.443.392.500\]](#)
    - [Mouth Neoplasms \[C04.588.443.591\]](#)
      - [Gingival Neoplasms \[C04.588.443.591.402\]](#)
      - [Leukoplakia, Oral \[C04.588.443.591.545\]](#)
        - [Leukoplakia, Hairy \[C04.588.443.591.545.500\]](#)
      - [Lip Neoplasms \[C04.588.443.591.550\]](#)
      - [Palatal Neoplasms \[C04.588.443.591.692\]](#)
      - [Salivary Gland Neoplasms \[C04.588.443.591.824\]](#)
        - [Parotid Neoplasms \[C04.588.443.591.824.695\]](#)
        - [Sublingual Gland Neoplasms \[C04.588.443.591.824.882\]](#)
        - [Submandibular Gland Neoplasms \[C04.588.443.591.824.885\]](#)
      - [Tongue Neoplasms \[C04.588.443.591.925\]](#)
    - [Otorhinolaryngologic Neoplasms \[C04.588.443.665\]](#)
      - [Ear Neoplasms \[C04.588.443.665.312\]](#)

- [Laryngeal Neoplasms \[C04.588.443.665.481\]](#)
- [Nose Neoplasms \[C04.588.443.665.650\]](#)
  - [Paranasal Sinus Neoplasms \[C04.588.443.665.650.693\]](#)
- [Pharyngeal Neoplasms \[C04.588.443.665.710\]](#)
  - [Hypopharyngeal Neoplasms \[C04.588.443.665.710.485\]](#)
  - [Nasopharyngeal Neoplasms \[C04.588.443.665.710.650\]](#)
    - [Nasopharyngeal Carcinoma \[C04.588.443.665.710.650.500\]](#)
  - [Oropharyngeal Neoplasms \[C04.588.443.665.710.684\]](#)
    - [Tonsillar Neoplasms \[C04.588.443.665.710.684.800\]](#)
- [Parathyroid Neoplasms \[C04.588.443.680\]](#)
- [Thyroid Neoplasms \[C04.588.443.915\]](#)
  - [Thyroid Cancer, Papillary \[C04.588.443.915.400\]](#)
  - [Thyroid Nodule \[C04.588.443.915.800\]](#)
- [Tracheal Neoplasms \[C04.588.443.925\]](#)
- [Hematologic Neoplasms \[C04.588.448\]](#)
  - [Bone Marrow Neoplasms \[C04.588.448.200\]](#)
    - [Polycythemia Vera \[C04.588.448.200.500\]](#)
- [Mammary Neoplasms, Animal \[C04.588.531\]](#)
  - [Mammary Neoplasms, Experimental \[C04.588.531.500\]](#)
- [Nervous System Neoplasms \[C04.588.614\]](#)
  - [Central Nervous System Neoplasms \[C04.588.614.250\]](#)
    - [Brain Neoplasms \[C04.588.614.250.195\]](#)
      - [Cerebral Ventricle Neoplasms \[C04.588.614.250.195.205\]](#)
        - [Choroid Plexus Neoplasms \[C04.588.614.250.195.205.200\]](#)
          - [Papilloma, Choroid Plexus \[C04.588.614.250.195.205.200.500\]](#)
      - [Infratentorial Neoplasms \[C04.588.614.250.195.411\]](#)
        - [Brain Stem Neoplasms \[C04.588.614.250.195.411.100\]](#)
          - [Diffuse Intrinsic Pontine Glioma \[C04.588.614.250.195.411.100.500\]](#)
        - [Cerebellar Neoplasms \[C04.588.614.250.195.411.211\]](#)
      - [Neurocytoma \[C04.588.614.250.195.648\]](#)
      - [Pinealoma \[C04.588.614.250.195.766\]](#)
      - [Supratentorial Neoplasms \[C04.588.614.250.195.885\]](#)
        - [Hypothalamic Neoplasms \[C04.588.614.250.195.885.500\]](#)
          - [Pallister-Hall Syndrome \[C04.588.614.250.195.885.500.299\]](#)
          - [Pituitary Neoplasms \[C04.588.614.250.195.885.500.600\]](#)
    - [Central Nervous System Cysts \[C04.588.614.250.387\]](#)
      - [Arachnoid Cysts \[C04.588.614.250.387.100\]](#)
      - [Colloid Cysts \[C04.588.614.250.387.200\]](#)
    - [Meningeal Neoplasms \[C04.588.614.250.580\]](#)
      - [Meningeal Carcinomatosis \[C04.588.614.250.580.150\]](#)
      - [Meningioma \[C04.588.614.250.580.500\]](#)
    - [Spinal Cord Neoplasms \[C04.588.614.250.803\]](#)
      - [Epidural Neoplasms \[C04.588.614.250.803.342\]](#)
  - [Cranial Nerve Neoplasms \[C04.588.614.300\]](#)

- [Neuroma, Acoustic \[C04.588.614.300.015\]](#)
    - [Optic Nerve Neoplasms \[C04.588.614.300.600\]](#)
      - [Optic Nerve Glioma \[C04.588.614.300.600.600\]](#)
  - [Paraneoplastic Syndromes, Nervous System \[C04.588.614.550\]](#)
    - [Anti-N-Methyl-D-Aspartate Receptor Encephalitis \[C04.588.614.550.112\]](#)
    - [Limbic Encephalitis \[C04.588.614.550.450\]](#)
    - [Myasthenia Gravis \[C04.588.614.550.500\]](#)
      - [Lambert-Eaton Myasthenic Syndrome \[C04.588.614.550.500.225\]](#)
    - [Myelitis, Transverse \[C04.588.614.550.550\]](#)
    - [Opsoclonus-Myoclonus Syndrome \[C04.588.614.550.600\]](#)
    - [Paraneoplastic Cerebellar Degeneration \[C04.588.614.550.650\]](#)
    - [Paraneoplastic Polyneuropathy \[C04.588.614.550.700\]](#)
  - [Peripheral Nervous System Neoplasms \[C04.588.614.596\]](#)
    - [Cranial Nerve Neoplasms \[C04.588.614.596.240\]](#)
      - [Neuroma, Acoustic \[C04.588.614.596.240.015\]](#)
      - [Optic Nerve Neoplasms \[C04.588.614.596.240.240\]](#)
        - [Optic Nerve Glioma \[C04.588.614.596.240.240.500\]](#)
- [Pelvic Neoplasms \[C04.588.699\]](#)
- [Skin Neoplasms \[C04.588.805\]](#)
  - [Acanthoma \[C04.588.805.040\]](#)
  - [Mastocytosis, Cutaneous \[C04.588.805.309\]](#)
    - [Mastocytoma, Skin \[C04.588.805.309.500\]](#)
    - [Urticaria Pigmentosa \[C04.588.805.309.850\]](#)
  - [Sebaceous Gland Neoplasms \[C04.588.805.578\]](#)
    - [Muir-Torre Syndrome \[C04.588.805.578.500\]](#)
  - [Sweat Gland Neoplasms \[C04.588.805.776\]](#)
- [Soft Tissue Neoplasms \[C04.588.839\]](#)
  - [Muscle Neoplasms \[C04.588.839.500\]](#)
  - [Vascular Neoplasms \[C04.588.839.750\]](#)
- [Splenic Neoplasms \[C04.588.842\]](#)
- [Thoracic Neoplasms \[C04.588.894\]](#)
  - [Heart Neoplasms \[C04.588.894.309\]](#)
    - [Cardiac Papillary Fibroelastoma \[C04.588.894.309.250\]](#)
    - [Carney Complex \[C04.588.894.309.500\]](#)
  - [Mediastinal Neoplasms \[C04.588.894.479\]](#)
  - [Respiratory Tract Neoplasms \[C04.588.894.797\]](#)
    - [Lung Neoplasms \[C04.588.894.797.520\]](#)
      - [Adenocarcinoma of Lung \[C04.588.894.797.520.055\]](#)
        - [Adenocarcinoma, Bronchiolo-Alveolar \[C04.588.894.797.520.055.500\]](#)
      - [Bronchial Neoplasms \[C04.588.894.797.520.109\]](#)
        - [Carcinoma, Bronchogenic \[C04.588.894.797.520.109.220\]](#)
          - [Carcinoma, Non-Small-Cell Lung \[C04.588.894.797.520.109.220.249\]](#)
          - [Small Cell Lung Carcinoma \[C04.588.894.797.520.109.220.624\]](#)
        - [Mesothelioma, Malignant \[C04.588.894.797.520.173\]](#)
        - [Multiple Pulmonary Nodules \[C04.588.894.797.520.237\]](#)

- [Pancoast Syndrome \[C04.588.894.797.520.734\]](#)
  - [Pulmonary Blastoma \[C04.588.894.797.520.867\]](#)
  - [Pulmonary Sclerosing Hemangioma \[C04.588.894.797.520.933\]](#)
  - [Pleural Neoplasms \[C04.588.894.797.640\]](#)
    - [Mesothelioma, Malignant \[C04.588.894.797.640.350\]](#)
    - [Pleural Effusion, Malignant \[C04.588.894.797.640.700\]](#)
    - [Solitary Fibrous Tumor, Pleural \[C04.588.894.797.640.800\]](#)
  - [Tracheal Neoplasms \[C04.588.894.797.760\]](#)
- [Thymus Neoplasms \[C04.588.894.949\]](#)
  - [Thymoma \[C04.588.894.949.500\]](#)
- [Urogenital Neoplasms \[C04.588.945\]](#)
  - [Genital Neoplasms, Female \[C04.588.945.418\]](#)
    - [Fallopian Tube Neoplasms \[C04.588.945.418.365\]](#)
    - [Uterine Neoplasms \[C04.588.945.418.948\]](#)
      - [Endometrial Neoplasms \[C04.588.945.418.948.585\]](#)
        - [Carcinoma, Endometrioid \[C04.588.945.418.948.585.124\]](#)
      - [Uterine Cervical Neoplasms \[C04.588.945.418.948.850\]](#)
    - [Vaginal Neoplasms \[C04.588.945.418.955\]](#)
    - [Vulvar Neoplasms \[C04.588.945.418.968\]](#)
  - [Genital Neoplasms, Male \[C04.588.945.440\]](#)
    - [Penile Neoplasms \[C04.588.945.440.715\]](#)
    - [Prostatic Neoplasms \[C04.588.945.440.770\]](#)
      - [Prostatic Neoplasms, Castration-Resistant \[C04.588.945.440.770.500\]](#)
    - [Testicular Neoplasms \[C04.588.945.440.915\]](#)
      - [Sertoli-Leydig Cell Tumor \[C04.588.945.440.915.500\]](#)
        - [Leydig Cell Tumor \[C04.588.945.440.915.500.249\]](#)
        - [Sertoli Cell Tumor \[C04.588.945.440.915.500.500\]](#)
  - [Urologic Neoplasms \[C04.588.945.947\]](#)
    - [Kidney Neoplasms \[C04.588.945.947.535\]](#)
      - [Carcinoma, Renal Cell \[C04.588.945.947.535.160\]](#)
      - [Wilms Tumor \[C04.588.945.947.535.585\]](#)
        - [Denys-Drash Syndrome \[C04.588.945.947.535.585.220\]](#)
        - [WAGR Syndrome \[C04.588.945.947.535.585.950\]](#)
      - [Nephroma, Mesoblastic \[C04.588.945.947.535.790\]](#)
    - [Ureteral Neoplasms \[C04.588.945.947.940\]](#)
    - [Urethral Neoplasms \[C04.588.945.947.945\]](#)
    - [Urinary Bladder Neoplasms \[C04.588.945.947.960\]](#)
  - [Venereal Tumors, Veterinary \[C04.588.945.956\]](#)



**Supplementary Table S3.** Malignant primary CNS tumors categorized by 5-year survival rates of CBTRUS Report

| <b>Category</b><br>(5-Year Overall Survival Rates) | <b>CBTRUS CNS Tumor Diagnoses</b>                                                                                                                                                                                                                                                                                                                                                                                                                                                                                      |
|----------------------------------------------------|------------------------------------------------------------------------------------------------------------------------------------------------------------------------------------------------------------------------------------------------------------------------------------------------------------------------------------------------------------------------------------------------------------------------------------------------------------------------------------------------------------------------|
| <b>Lowest Survival</b><br>(7.2% - 32%)             | Glioblastoma<br>Anaplastic Astrocytoma<br>Primary Melanocytic Lesions - malignant<br>Neoplasm Unspecified – malignant                                                                                                                                                                                                                                                                                                                                                                                                  |
| <b>Moderate Survival</b><br>(37.6% - 70.7%)        | Lymphoma<br>Diffuse Astrocytoma<br>Glioma Malignant, NOS*<br>Unique Astrocytoma Variants – malignant<br>Embryonal Tumors – malignant<br>Anaplastic Oligodendroglioma<br>Mesenchymal Tumors – malignant<br>Meningioma – malignant<br>Other Hemopoietic Neoplasms<br>Oligoastrocytic Tumors<br>Choroid Plexus Tumors – malignant<br>Tumors of the Pineal Region – malignant<br>Choroid Plexus Tumors – malignant<br>Nerve Sheath Tumors – malignant<br>Other Neuroepithelial Tumors – malignant<br>All Other – malignant |
| <b>Highest Survival</b><br>(76.9% - 94.5%)         | Neuronal and Mixed Neuronal Glial Tumors – malignant<br>Other Neoplasms Related to the Meninges – malignant<br>Tumors of the Pituitary – malignant<br>Oligodendroglioma<br>Craniopharyngioma<br>Ependymal Tumors – malignant<br>Germ Cell Tumors, Cysts and Heterotopias – malignant<br>Other Tumors of Cranial and Spinal Nerves<br>Hemangioma<br>Pilocytic Astrocytoma                                                                                                                                               |
| <b>All</b><br>(36%)                                | Average for All Malignant CNS Tumors                                                                                                                                                                                                                                                                                                                                                                                                                                                                                   |

\*NOS=not otherwise specified

**Supplementary Table S4.** CBTRUS malignant CNS tumor diagnoses (linked to incidence) mapped to CNS tumor search terms (linked to trial conditions).

| <b>CBTRUS CNS Tumor Diagnoses for Incidence Data</b>                     | <b>CNS Tumor Search Terms derived from WHO Classification</b>                                         | <b>Method</b>                                                 |
|--------------------------------------------------------------------------|-------------------------------------------------------------------------------------------------------|---------------------------------------------------------------|
| “pilocytic astrocytoma”, “diffuse astrocytoma”, “anaplastic astrocytoma” | “astrocytoma”                                                                                         | Grouped among trial terms                                     |
| “anaplastic oligodendroglioma” and “oligodendroglioma”                   | “oligodendroglioma”                                                                                   |                                                               |
| “glioblastoma”                                                           | “GBM”                                                                                                 | Synonym                                                       |
| “other neoplasms related to the meninges”                                | Any terms containing “meninge” *                                                                      | Synonym                                                       |
| “tumors of the pituitary”                                                | Any terms containing “pituitary”                                                                      | Synonym                                                       |
| “ependymal tumors”                                                       | Any terms containing “ependym”                                                                        | Synonym                                                       |
| “oligoastrocytic tumors”                                                 | Any terms containing “oligoastro”                                                                     | Synonym                                                       |
| “nerve sheath tumors”                                                    | Any terms containing “nerve sheath”                                                                   | Synonym                                                       |
| “germ cell tumors, cysts and heterotopias”                               | Any terms containing “germ cell”                                                                      | Synonym                                                       |
| “choroid plexus tumors”                                                  | Any terms containing “choroid plexus”                                                                 | Synonym                                                       |
| “oligodendroglioma”                                                      | “oligodendroglial tumor”                                                                              | Synonym                                                       |
| “embryonal tumors”                                                       | “Medulloblastoma”; any terms containing “embryonal”, “neuroectodermal tumor”, “neuroectodermal tumor” | Grouping indicated by CBTRUS report                           |
| “germ cell tumors, cysts and heterotopias”                               | “teratoma”, “yolk sac tumor”, “choriocarcinoma”, “germinoma”,                                         | Mapped term to ICD-O-3 code that are grouped by CBTRUS report |
| “mesenchymal tumors”                                                     | “hemangiopericytoma”                                                                                  | Mapped term to ICD-O-3 code that are grouped by CBTRUS report |
| “tumors of the pineal region”                                            | Any terms containing “pineal” or “pineo”                                                              | Mapped term to ICD-O-3 code that are grouped by CBTRUS report |
| “other neoplasms related to the meninges”                                | “chordoma”                                                                                            | Mapped term to ICD-O-3 code that are grouped by CBTRUS report |

|                                            |                                                                                                                                 |                                                                                                                                |
|--------------------------------------------|---------------------------------------------------------------------------------------------------------------------------------|--------------------------------------------------------------------------------------------------------------------------------|
| “glioblastoma”                             | “gliosarcoma”                                                                                                                   | Mapped term to ICD-O-3 code that are grouped by CBTRUS report                                                                  |
| “astrocytoma”                              | “xanthoastrocytoma”, “gliomatosis”                                                                                              | Mapped term to ICD-O-3 code that are grouped by CBTRUS report                                                                  |
| “neuronal and mixed neuronal glial tumors” | “paraganglioma”, “neurocytoma”, “neuroepithelial tumor”, “ganglioglioma”, “neuronal tumor”; any terms containing “glioneuronal” | Mapped term to ICD-O-3 code that are grouped by CBTRUS report                                                                  |
| “astrocytoma”                              | “diffuse intrinsic pontine glioma”                                                                                              | Using WHO 2016 definition<br><a href="https://pubmed.ncbi.nlm.nih.gov/27157931/">https://pubmed.ncbi.nlm.nih.gov/27157931/</a> |

\*This excludes meningiomas, which has a separate incidence

**Supplementary Table S5.** Top 15 most frequently studied combinations of conditions among trials.

| <b>Combination of Conditions Studied</b>                                                                                                                                                                                                                                                                                                                                                                                                                      | <b>Number of Trials</b> |
|---------------------------------------------------------------------------------------------------------------------------------------------------------------------------------------------------------------------------------------------------------------------------------------------------------------------------------------------------------------------------------------------------------------------------------------------------------------|-------------------------|
| Glioblastoma                                                                                                                                                                                                                                                                                                                                                                                                                                                  | 532                     |
| Glioma                                                                                                                                                                                                                                                                                                                                                                                                                                                        | 264                     |
| Central Nervous System Neoplasms, Glioma, Nervous System Neoplasms                                                                                                                                                                                                                                                                                                                                                                                            | 261                     |
| Central Nervous System Neoplasms, Glioblastoma, Nervous System Neoplasms                                                                                                                                                                                                                                                                                                                                                                                      | 243                     |
| Glioblastoma, Gliosarcoma                                                                                                                                                                                                                                                                                                                                                                                                                                     | 174                     |
| Glioblastoma, Glioma                                                                                                                                                                                                                                                                                                                                                                                                                                          | 158                     |
| Central Nervous System Neoplasms, Nervous System Neoplasms                                                                                                                                                                                                                                                                                                                                                                                                    | 110                     |
| Astrocytoma, Glioblastoma, Glioma                                                                                                                                                                                                                                                                                                                                                                                                                             | 93                      |
| Central Nervous System Neoplasms, Ependymoma, Glioma, Hepatoblastoma, Histiocytosis, Histiocytosis, Langerhans-Cell, Lymphoma, Lymphoma, Non-Hodgkin, Medulloblastoma, Neoplasms, Neoplasms, Germ Cell and Embryonal, Nervous System Neoplasms, Neuroblastoma, Neuroectodermal Tumors, Neuroectodermal Tumors, Primitive, Neuroectodermal Tumors, Primitive, Peripheral, Osteosarcoma, Rhabdoid Tumor, Rhabdomyosarcoma, Sarcoma, Sarcoma, Ewing, Wilms Tumor | 88                      |
| Adenoma, Pituitary Diseases, Pituitary Neoplasms                                                                                                                                                                                                                                                                                                                                                                                                              | 72                      |
| Brain Neoplasms, Glioma                                                                                                                                                                                                                                                                                                                                                                                                                                       | 72                      |
| Lymphoma                                                                                                                                                                                                                                                                                                                                                                                                                                                      | 71                      |
| Astrocytoma, Glioblastoma                                                                                                                                                                                                                                                                                                                                                                                                                                     | 70                      |
| Brain Neoplasms, Glioblastoma                                                                                                                                                                                                                                                                                                                                                                                                                                 | 70                      |
| Astrocytoma, Glioblastoma, Glioma, Oligodendroglioma                                                                                                                                                                                                                                                                                                                                                                                                          | 64                      |

**Supplementary Table S6.** Primary outcomes of trials by phase and number of trial arm by design. Single arm trials were defined as studies reporting “number of arms” as one. Trials without number of arms, phase, or outcome type information were excluded.

| Phase<br>n (%), N = 1238)       | Single Arm |              | Outcome   |              |
|---------------------------------|------------|--------------|-----------|--------------|
|                                 | Design     | n (%)        |           | n (%)        |
| Early Phase 1<br>15 (1.38%)     | Single Arm | 12 (80%)     | OS        | 6 (50%)      |
|                                 |            |              | PFS       | 7 (58.33%)   |
|                                 |            |              | OS or PFS | 10 (83.33%)  |
|                                 |            |              | RESPONSE  | 2 (16.67%)   |
|                                 | Multi Arm  | 3 (20%)      | OS        | 1 (33.33%)   |
|                                 |            |              | PFS       | 0 (0%)       |
|                                 |            |              | OS or PFS | 1 (33.33%)   |
|                                 |            |              | RESPONSE  | 2 (66.67%)   |
| Phase 1<br>58 (5.34%)           | Single Arm | 35 (60.34%)  | OS        | 10 (28.57%)  |
|                                 |            |              | PFS       | 19 (54.29%)  |
|                                 |            |              | OS or PFS | 24 (68.57%)  |
|                                 |            |              | RESPONSE  | 15 (42.86%)  |
|                                 | Multi Arm  | 23 (39.66%)  | OS        | 3 (13.04%)   |
|                                 |            |              | PFS       | 14 (60.87%)  |
|                                 |            |              | OS or PFS | 14 (60.87%)  |
|                                 |            |              | RESPONSE  | 12 (52.17%)  |
| Phase 1/Phase 2<br>182 (16.76%) | Single Arm | 92 (50.55%)  | OS        | 33 (35.87%)  |
|                                 |            |              | PFS       | 37 (40.22%)  |
|                                 |            |              | OS or PFS | 59 (64.13%)  |
|                                 |            |              | RESPONSE  | 39 (42.39%)  |
|                                 | Multi Arm  | 90 (49.45%)  | OS        | 26 (28.89%)  |
|                                 |            |              | PFS       | 44 (48.89%)  |
|                                 |            |              | OS or PFS | 61 (67.78%)  |
|                                 |            |              | RESPONSE  | 39 (43.33%)  |
| Phase 2<br>714 (65.75%)         | Single Arm | 463 (64.85%) | OS        | 93 (20.09%)  |
|                                 |            |              | PFS       | 184 (39.74%) |
|                                 |            |              | OS or PFS | 257 (55.51%) |
|                                 |            |              | RESPONSE  | 237 (51.19%) |
|                                 | Multi Arm  | 251 (35.15%) | OS        | 67 (26.69%)  |
|                                 |            |              | PFS       | 139 (55.38%) |
|                                 |            |              | OS or PFS | 189 (75.3%)  |
|                                 |            |              | RESPONSE  | 80 (31.87%)  |
| Phase 2/Phase 3<br>23 (2.12%)   | Single Arm | 5 (21.74%)   | OS        | 3 (60%)      |
|                                 |            |              | PFS       | 1 (20%)      |
|                                 |            |              | OS or PFS | 4 (80%)      |
|                                 |            |              | RESPONSE  | 1 (20%)      |
|                                 | Multi Arm  | 18 (78.26%)  | OS        | 12 (66.67%)  |
|                                 |            |              | PFS       | 9 (50%)      |
|                                 |            |              | OS or PFS | 17 (94.44%)  |
|                                 |            |              | RESPONSE  | 2 (11.11%)   |
| Phase 3<br>86 (7.92%)           | Single Arm | 1 (1.16%)    | OS        | 0 (0%)       |
|                                 |            |              | PFS       | 0 (0%)       |
|                                 |            |              | OS or PFS | 0 (0%)       |
|                                 |            |              | RESPONSE  | 1 (100%)     |
|                                 | Multi Arm  | 85 (98.84%)  | OS        | 51 (60%)     |
|                                 |            |              | PFS       | 36 (42.35%)  |
|                                 |            |              | OS or PFS | 81 (95.29%)  |
|                                 |            |              | RESPONSE  | 4 (4.71%)    |
|                                 | Single Arm | 1 (12.5%)    | OS        | 0 (0%)       |

|                      |           |           |           |            |
|----------------------|-----------|-----------|-----------|------------|
| Phase 4<br>8 (0.74%) |           | PFS       | 1 (100%)  |            |
|                      |           | OS or PFS | 1 (100%)  |            |
|                      |           | RESPONSE  | 1 (100%)  |            |
|                      | Multi Arm | 7 (87.5%) | OS        | 5 (71.43%) |
|                      |           |           | PFS       | 2 (28.57%) |
|                      |           |           | OS or PFS | 7 (100%)   |
|                      |           |           | RESPONSE  | 0 (0%)     |

**Supplementary Table S7.** All outcomes of trials by phase and number of trial arm by design. All outcomes include primary, secondary, or other. Single arm trials were defined as studies reporting “number of arms” as one. Trials without number of arms, phase, or outcome type information were excluded.

| Phase<br>n (% , N = 1238)       | Single Arm |              | Outcome   | n (%)        |
|---------------------------------|------------|--------------|-----------|--------------|
|                                 | Design     | n (%)        |           |              |
| Early Phase 1<br>39 (2.38%)     | Single Arm | 24 (61.54%)  | OS        | 15 (62.5%)   |
|                                 |            |              | PFS       | 19 (79.17%)  |
|                                 |            |              | OS or PFS | 22 (91.67%)  |
|                                 |            |              | RESPONSE  | 8 (33.33%)   |
|                                 | Multi Arm  | 15 (38.46%)  | OS        | 11 (73.33%)  |
|                                 |            |              | PFS       | 13 (86.67%)  |
|                                 |            |              | OS or PFS | 14 (93.33%)  |
|                                 |            |              | RESPONSE  | 6 (40%)      |
| Phase 1<br>360 (21.98%)         | Single Arm | 235 (65.28%) | OS        | 147 (62.55%) |
|                                 |            |              | PFS       | 164 (69.79%) |
|                                 |            |              | OS or PFS | 199 (84.68%) |
|                                 |            |              | RESPONSE  | 125 (53.19%) |
|                                 | Multi Arm  | 125 (34.72%) | OS        | 81 (64.8%)   |
|                                 |            |              | PFS       | 105 (84%)    |
|                                 |            |              | OS or PFS | 112 (89.6%)  |
|                                 |            |              | RESPONSE  | 70 (56%)     |
| Phase 1/Phase 2<br>269 (16.42%) | Single Arm | 143 (53.16%) | OS        | 104 (72.73%) |
|                                 |            |              | PFS       | 107 (74.83%) |
|                                 |            |              | OS or PFS | 123 (86.01%) |
|                                 |            |              | RESPONSE  | 80 (55.94%)  |
|                                 | Multi Arm  | 126 (46.84%) | OS        | 86 (68.25%)  |
|                                 |            |              | PFS       | 96 (76.19%)  |
|                                 |            |              | OS or PFS | 111 (88.1%)  |
|                                 |            |              | RESPONSE  | 85 (67.46%)  |
| Phase 2<br>820 (50.06%)         | Single Arm | 534 (65.12%) | OS        | 339 (63.48%) |
|                                 |            |              | PFS       | 395 (73.97%) |
|                                 |            |              | OS or PFS | 458 (85.77%) |
|                                 |            |              | RESPONSE  | 362 (67.79%) |
|                                 | Multi Arm  | 286 (34.88%) | OS        | 216 (75.52%) |
|                                 |            |              | PFS       | 241 (84.27%) |
|                                 |            |              | OS or PFS | 261 (91.26%) |
|                                 |            |              | RESPONSE  | 168 (58.74%) |
| Phase 2/Phase 3<br>27 (1.65%)   | Single Arm | 6 (22.22%)   | OS        | 6 (100%)     |
|                                 |            |              | PFS       | 1 (16.67%)   |
|                                 |            |              | OS or PFS | 6 (100%)     |
|                                 |            |              | RESPONSE  | 1 (16.67%)   |
|                                 | Multi Arm  | 21 (77.78%)  | OS        | 20 (95.24%)  |
|                                 |            |              | PFS       | 19 (90.48%)  |
|                                 |            |              | OS or PFS | 21 (100%)    |
|                                 |            |              | RESPONSE  | 11 (52.38%)  |
| Phase 3<br>111 (6.78%)          | Single Arm | 2 (1.8%)     | OS        | 1 (50%)      |
|                                 |            |              | PFS       | 1 (50%)      |
|                                 |            |              | OS or PFS | 1 (50%)      |
|                                 |            |              | RESPONSE  | 1 (50%)      |
|                                 | Multi Arm  | 109 (98.2%)  | OS        | 92 (84.4%)   |
|                                 |            |              | PFS       | 84 (77.06%)  |
|                                 |            |              | OS or PFS | 104 (95.41%) |
|                                 |            |              | RESPONSE  | 40 (36.7%)   |

|                           |                       |           |            |
|---------------------------|-----------------------|-----------|------------|
| Phase 4<br><br>12 (0.73%) | Single Arm    3 (25%) | OS        | 2 (66.67%) |
|                           |                       | PFS       | 3 (100%)   |
|                           |                       | OS or PFS | 3 (100%)   |
|                           |                       | RESPONSE  | 2 (66.67%) |
|                           | Multi Arm    9 (75%)  | OS        | 9 (100%)   |
|                           |                       | PFS       | 5 (55.56%) |
|                           |                       | OS or PFS | 9 (100%)   |
|                           |                       | RESPONSE  | 2 (22.22%) |



**Supplementary Table S8.** Reporting of baseline patient counts by subgroup stratification. The registry provides space to report baseline patient counts by trial arm, stratification, or subgroups. To demonstrate availability of data that may of interest for downstream analyses, we assessed the proportion of trials reporting baseline counts by various patient subgroups among all interventional studies and among completed studies with sufficient information to curate trial arms (as described in methods) and any data on an efficacy outcome.

|                                                   | % of trials reporting baseline counts by subgroup |                                                                     |
|---------------------------------------------------|---------------------------------------------------|---------------------------------------------------------------------|
|                                                   | Completed studies<br>(N=1271)                     | Completed studies with<br>curated arms and efficacy<br>data (N=168) |
| Any baseline counts                               | 28.0% (n=356)                                     | 100% (n=168)                                                        |
| <b>Subgroups</b>                                  |                                                   |                                                                     |
| Sex/gender                                        | 28.0% (n=356)                                     | 100% (n=168)                                                        |
| Age groups                                        | 28.0% (n=356)                                     | 100% (n=168)                                                        |
| Enrollment location                               | 16.5% (n=210)                                     | 53.6% (n=90)                                                        |
| Race/ethnicity                                    | 13.6% (n=173)                                     | 44.6% (n=75)                                                        |
| Performance status or<br>comorbidity index        | 3.9% (n=50)                                       | 17.9% (n=30)                                                        |
| Diagnostic, histologic, or<br>molecular subgroups | 3.6% (n=46)                                       | 14.9% (n=25)                                                        |
| Prior treatment                                   | 2.0% (n=26)                                       | 7.1% (n=12)                                                         |
| Steroid use                                       | 0.4% (n=6)                                        | 2.4% (n=4)                                                          |
| Anticonvulsant use                                | 0.3% (n=4)                                        | 1.8% (n=3)                                                          |
| All other                                         | 17.8% (n=226)                                     | 57.8% (n=97)                                                        |

**Supplementary Table S9.** Logistic regression analysis of reporting of designs, enrollment, results, and publications by trial characteristics.

| Trial Characteristic (n trials reporting) |                 | Number of Trials (%)** | Logistic Regression – OR (FDR adjusted p-value) |                      |                     |                      |
|-------------------------------------------|-----------------|------------------------|-------------------------------------------------|----------------------|---------------------|----------------------|
|                                           |                 |                        | Reported Design                                 | Reported Enrollment* | Reported Results    | Reported Publication |
| <b>Primary Sponsor</b><br>(n = 1270)      | Industry        | 228 (18%)              | -                                               | -                    | -                   | -                    |
|                                           | Other           | 861 (68%)              | 0.72 (0.999)                                    | 1.18 (0.999)         | 1.70 (0.861)        | 0.90 (0.999)         |
|                                           | NIH             | 181 (14%)              | INF (0.999)                                     | INF (0.999)          | INF (0.999)         | 0.68 (0.999)         |
| <b>Phase</b><br>(n = 1142)                | Phase 3         | 77 (7%)                | -                                               | -                    | -                   | -                    |
|                                           | Early Phase 1   | 28 (2%)                | -                                               | 1.40 (0.999)         | -INF (0.999)        | -INF (0.999)         |
|                                           | Phase 1         | 353 (31%)              | -                                               | 1.72 (0.999)         | <b>0.07 (0.020)</b> | 0.56 (0.999)         |
|                                           | Phase 1/Phase 2 | 148 (13%)              | -                                               | INF (0.999)          | 0.83 (0.999)        | 0.75 (0.999)         |
|                                           | Phase 2         | 517 (45%)              | -                                               | 3.66 (0.019)         | 1.34 (0.999)        | 0.54 (0.999)         |
|                                           | Phase 2/Phase 3 | 8 (1%)                 | -                                               | INF (0.999)          | 0.60 (0.999)        | 0.24 (0.999)         |
|                                           | Phase 4         | 11 (1%)                | -                                               | INF (0.999)          | 2.63 (0.999)        | 1.35 (0.999)         |
| <b>Primary Purpose</b><br>(n = 1259)      | Treatment       | 1110 (88%)             | -                                               | -                    | -                   | -                    |
|                                           | Diagnostic      | 65 (5%)                | INF (0.999)                                     | 0.12 (0.856)         | 0.53 (0.999)        | 1.63 (0.999)         |
|                                           | Supportive Care | 36 (3%)                | INF (0.999)                                     | INF (0.999)          | 0.31 (0.999)        | 2.20 (0.999)         |
|                                           | Other           | 16 (1%)                | INF (0.999)                                     | INF (0.999)          | INF (0.999)         | -INF (0.999)         |
|                                           | Basic Science   | 12 (1%)                | INF (0.999)                                     | 0.28 (0.999)         | -INF (0.999)        | 18.92 (0.746)        |
|                                           | Prevention      | 11 (1%)                | INF (0.999)                                     | INF (0.999)          | -INF (0.999)        | -INF (0.999)         |
| <b>Intervention Model</b><br>(n = 1073)   | Parallel        | 258 (24%)              | -                                               | -                    | -                   | -                    |
|                                           | Single Group    | 778 (73%)              | -                                               | 0.34 (0.861)         | 0.51 (0.821)        | 0.66 (0.999)         |
|                                           | Sequential      | 20 (2%)                | -                                               | INF (0.999)          | 5.04 (0.701)        | 4.20 (0.701)         |
|                                           | Crossover       | 13 (1%)                | -                                               | INF (0.999)          | 1.01 (0.999)        | 1.43 (0.999)         |
|                                           | Factorial       | 4 (0.4%)               | -                                               | 2.51 (0.999)         | -INF (0.999)        | INF (0.999)          |
| <b>Has DMC</b><br>(n = 871)               | TRUE            | 545 (63%)              | -                                               | -                    | -                   | -                    |
|                                           | FALSE           | 326 (37%)              | 0.71 (0.999)                                    | 0.44 (0.861)         | 0.95 (0.999)        | 0.35 (0.269)         |
| <b>Randomization</b><br>(n = 500)         | TRUE            | 220 (44%)              | -                                               | -                    | -                   | -                    |
|                                           | FALSE           | 280 (56%)              | -                                               | 1.46 (0.999)         | 2.97 (0.296)        | 1.35 (0.999)         |
| <b>Blinding</b><br>(n = 1108)             | Double          | 27 (2%)                | -                                               | -                    | -                   | -                    |
|                                           | Open Label      | 1029 (93%)             | -                                               | -INF (0.999)         | 0.09 (0.179)        | 2.58 (0.999)         |
|                                           | Single          | 30 (3%)                | -                                               | 1.32 (0.999)         | 0.08 (0.701)        | -INF (0.999)         |
|                                           | Triple          | 11 (1%)                | -                                               | 2.28 (0.999)         | 0.11 (0.701)        | 8.84 (0.821)         |
|                                           | Quadruple       | 11 (1%)                | -                                               | -INF (0.999)         | -INF (0.999)        | -INF (0.999)         |
| <b>Year</b>                               | Median          | 2008                   |                                                 | 1.01 (0.999)         | 1.03 (0.999)        | <b>0.87 (0.020)</b>  |

|            |              |                        |                                     |  |  |  |
|------------|--------------|------------------------|-------------------------------------|--|--|--|
| (n = 1271) | (range, IQR) | (1985-2020, 2003-2012) | <b>1.24</b><br><b>(&lt;0.00001)</b> |  |  |  |
|------------|--------------|------------------------|-------------------------------------|--|--|--|

\*Trials reporting both anticipated and actual enrollment

**Supplementary Table S10.** Accrual analyses stratified by conditions studied by each trial

| Condition Term         | Survival Category | Enrollment Type | median N | Q1   | Q3    | median % enrolled | Q1 (%) | Q3 (%) | p val*         | N Trials |
|------------------------|-------------------|-----------------|----------|------|-------|-------------------|--------|--------|----------------|----------|
| glioblastoma           | Low               | Actual          | 37       | 19.3 | 74.8  | 100               | 71.0   | 100    | <b>0.00000</b> | 542      |
|                        |                   | Anticipated     | 50       | 27   | 86.8  |                   |        |        |                |          |
| astrocytoma            | Moderate          | Actual          | 29       | 18.8 | 55.8  | 100               | 66.3   | 100    | <b>0.00024</b> | 48       |
|                        |                   | Anticipated     | 39.5     | 26.5 | 60    |                   |        |        |                |          |
| chordoma               | Moderate          | Actual          | 45.5     | 35   | 157   | 100               | 77.2   | 100    | 0.05017        | 10       |
|                        |                   | Anticipated     | 52.5     | 41   | 163.8 |                   |        |        |                |          |
| choriocarcinoma        | Moderate          | Actual          | 28       | 20   | 51.8  | 100               | 100    | 100    | 0.50000        | 10       |
|                        |                   | Anticipated     | 38.5     | 20.3 | 52    |                   |        |        |                |          |
| choroid plexus tumor   | Moderate          | Actual          | 20       | 15.5 | 100.5 | 100               | 84.4   | 100    | 0.50000        | 3        |
|                        |                   | Anticipated     | 20       | 18   | 100.5 |                   |        |        |                |          |
| cns lymphoma           | Moderate          | Actual          | 29.5     | 13.5 | 53.3  | 100               | 73.9   | 100    | <b>0.00024</b> | 36       |
|                        |                   | Anticipated     | 37       | 20   | 60    |                   |        |        |                |          |
| dipg                   | Moderate          | Actual          | 29       | 25   | 36    | 96.67             | 85.    | 100    | <b>0.01776</b> | 9        |
|                        |                   | Anticipated     | 32       | 28   | 42    |                   |        |        |                |          |
| embryonal carcinoma    | Moderate          | Actual          | 20       | 15   | 21    | 100               | 37.5   | 100    | 0.18555        | 5        |
|                        |                   | Anticipated     | 24       | 21   | 43    |                   |        |        |                |          |
| ganglioglioma          | Moderate          | Actual          | 23       | 23   | 23    | 100               | 100    | 100    | 1.00000        | 1        |
|                        |                   | Anticipated     | 23       | 23   | 23    |                   |        |        |                |          |
| germinoma              | Moderate          | Actual          | 38       | 22   | 77.5  | 100               | 100    | 100    | 0.09072        | 19       |
|                        |                   | Anticipated     | 41       | 22   | 77.5  |                   |        |        |                |          |
| glioma                 | Moderate          | Actual          | 30       | 17   | 58    | 100               | 71.43  | 100    | <b>0.00000</b> | 225      |
|                        |                   | Anticipated     | 40       | 24   | 64    |                   |        |        |                |          |
| gliosarcoma            | Moderate          | Actual          | 25       | 14.5 | 35.5  | 27.1              | 15.6   | 38.5   | 0.25000        | 2        |
|                        |                   | Anticipated     | 94       | 93   | 95    |                   |        |        |                |          |
| hemangiopericytoma     | Moderate          | Actual          | 45       | 24.8 | 50.8  | 90.5              | 67.8   | 100    | <b>0.02953</b> | 10       |
|                        |                   | Anticipated     | 50       | 42.5 | 57.8  |                   |        |        |                |          |
| meningeal melanocytoma | Moderate          | Actual          | 11       | 11   | 11    | 68.8              | 68.8   | 68.8   | 0.50000        | 1        |
|                        |                   | Anticipated     | 16       | 16   | 16    |                   |        |        |                |          |
| meningeal tumor        | Moderate          | Actual          | 88.5     | 65   | 125.5 | 100               | 100    | 100    | 0.50000        | 8        |
|                        |                   | Anticipated     | 88.5     | 65   | 130.5 |                   |        |        |                |          |
| meningioma             | Moderate          | Actual          | 29       | 14   | 70    | 100               | 76     | 100    | <b>0.00082</b> | 33       |
|                        |                   | Anticipated     | 44       | 20   | 70    |                   |        |        |                |          |
| nerve sheath tumor     | Moderate          | Actual          | 41.5     | 26.3 | 68.5  | 81.9              | 56.2   | 100    | <b>0.00296</b> | 18       |
|                        |                   | Anticipated     | 54       | 31.5 | 113   |                   |        |        |                |          |
| neuroectodermal tumor  | Moderate          | Actual          | 60       | 28.8 | 113.8 | 100               | 69.4   | 100    | <b>0.00016</b> | 48       |
|                        |                   | Anticipated     | 79       | 38.8 | 129.3 |                   |        |        |                |          |
| neuronal tumor         | Moderate          | Actual          | 8        | 8    | 8     | 6.7               | 6.7    | 6.7    | 0.50000        | 1        |
|                        |                   | Anticipated     | 120      | 120  | 120   |                   |        |        |                |          |

|                        |          |             |      |       |       |      |         |      |                |    |
|------------------------|----------|-------------|------|-------|-------|------|---------|------|----------------|----|
| oligoastrocytoma       | Moderate | Actual      | 33   | 15    | 61.5  | 100  | 79.5    | 100  | 0.05017        | 15 |
|                        |          | Anticipated | 42   | 25.5  | 61.5  |      |         |      |                |    |
| paraganglioma          | Moderate | Actual      | 23   | 19    | 36.8  | 97.3 | 49.2    | 100  | <b>0.00713</b> | 14 |
|                        |          | Anticipated | 38.5 | 25.5  | 50    |      |         |      |                |    |
| pineal tumor           | Moderate | Actual      | 5    | 5     | 5     | 100  | 100     | 100  | 1.00000        | 1  |
|                        |          | Anticipated | 5    | 5     | 5     |      |         |      |                |    |
| pineoblastoma          | Moderate | Actual      | 81.5 | 46.3  | 111   | 100  | 100     | 100  | 1.00000        | 4  |
|                        |          | Anticipated | 81.5 | 46.4  | 111   |      |         |      |                |    |
| pineocytoma            | Moderate | Actual      | 17   | 14    | 20    | 57.4 | 51.7    | 63.1 | 0.25000        | 2  |
|                        |          | Anticipated | 33   | 24.5  | 41.5  |      |         |      |                |    |
| pituitary tumor        | Moderate | Actual      | 9    | 9     | 9     | 42.9 | 42.9    | 42.9 | 0.50000        | 1  |
|                        |          | Anticipated | 21   | 21    | 21    |      |         |      |                |    |
| pnet                   | Moderate | Actual      | 54   | 19.5  | 122.3 | 85.7 | 39.5    | 100  | <b>0.00001</b> | 40 |
|                        |          | Anticipated | 78.5 | 29.8  | 182   |      |         |      |                |    |
| primary cns sarcoma    | Moderate | Actual      | 4    | 4     | 4     | 4.2  | 4.2     | 4.2  | 0.50000        | 1  |
|                        |          | Anticipated | 96   | 96    | 96    |      |         |      |                |    |
| primary cns tumor      | Moderate | Actual      | 32   | 30.5  | 35    | 100  | 95.0    | 100  | 0.18555        | 6  |
|                        |          | Anticipated | 34   | 32    | 36    |      |         |      |                |    |
| teratoma               | Moderate | Actual      | 30.5 | 16.3  | 50    | 100  | 59.8    | 100  | <b>0.02953</b> | 18 |
|                        |          | Anticipated | 43   | 30.5  | 53.8  |      |         |      |                |    |
| xanthoastrocytoma      | Moderate | Actual      | 23   | 23    | 23    | 100  | 100     | 100  | 1.00000        | 1  |
|                        |          | Anticipated | 23   | 23    | 23    |      |         |      |                |    |
| yolk sac tumor         | Moderate | Actual      | 28   | 20    | 45.3  | 100  | 100     | 100  | 0.50000        | 8  |
|                        |          | Anticipated | 38.5 | 20.75 | 46    |      |         |      |                |    |
| craniopharyngioma      | High     | Actual      | 19   | 12    | 23.5  | 100  | 92      | 100  | 0.18555        | 7  |
|                        |          | Anticipated | 19   | 12    | 37.5  |      |         |      |                |    |
| ependymoma             | High     | Actual      | 26   | 18    | 52.5  | 60   | 55      | 100  | 0.05017        | 7  |
|                        |          | Anticipated | 40   | 25    | 79    |      |         |      |                |    |
| germ cell tumor        | High     | Actual      | 28.5 | 19    | 46.75 | 100  | 96.1675 | 100  | <b>0.00036</b> | 50 |
|                        |          | Anticipated | 30.5 | 24    | 49.5  |      |         |      |                |    |
| medulloblastoma        | High     | Actual      | 43   | 27.5  | 62.5  | 100  | 60.855  | 100  | <b>0.00458</b> | 19 |
|                        |          | Anticipated | 53   | 33.5  | 106   |      |         |      |                |    |
| oligodendroglial tumor | High     | Actual      | 39   | 39    | 39    | 100  | 100     | 100  | 1.00000        | 1  |
|                        |          | Anticipated | 39   | 39    | 39    |      |         |      |                |    |
| pituitary tumor        | High     | Actual      | 42   | 30    | 80.25 | 100  | 80.5525 | 100  | <b>0.02953</b> | 18 |
|                        |          | Anticipated | 42   | 30    | 103   |      |         |      |                |    |

\*from One-Sided Paired Wilcoxon Test

**Supplementary Table S11.** Association between the odds of trial meeting enrollment goal (logistic regression) and percent of enrollment goal met by trials (linear regression) with year, existence of US trial sites, and anticipated enrollment target.

|                        | <b>Logistic Regression</b>                |
|------------------------|-------------------------------------------|
|                        | Odds of Trial Meeting Enrollment Goal (p) |
| Trial Year             | <b>0.85 (p&lt;0.00001)*</b>               |
| Has a US Trial Site    | <b>0.50 (p&lt;0.00001)</b>                |
| Anticipated Enrollment | 1.00 (p=0.357)                            |

\*Bolded values indicate significance at  $\alpha = 0.05$

**Supplementary Table S12. Size Effect Assumption Analysis.** For completed trials reporting actual enrollment and primary endpoints of OS/PFS/ORR, the minimum effect size that the trial is sufficiently powered to assess was computed. For OS/PFS calculations as described in the methods, survival information was based on data for Glioblastoma (100%) for the low survival category; on Glioma (56.2%), Neuroectodermal Neoplasm (9.0%), Astrocytoma (7.7%), Meningioma (7.7%), CNS Lymphoma (7.2%), and others (<7%) for the moderate survival category, and on Germ Cell Neoplasm (46.6%), Pituitary Neoplasm (24.6%), Medulloblastoma (16.7%), Ependymoma (8.5%), Craniopharyngioma (5.6%) and others (<1%) for the high survival category.

| Survival Category | Phase           | OS       |                       | PFS      |                       | Response Rate |                       |
|-------------------|-----------------|----------|-----------------------|----------|-----------------------|---------------|-----------------------|
|                   |                 | N Trials | Minimum Detectable ES | N Trials | Minimum Detectable ES | N Trials      | Minimum Detectable ES |
|                   |                 |          | Median (IQR)          |          | Median (IQR)          |               | Median (IQR)          |
| Low               | All             | 90       | 44% (36%-51%)         | 153      | 52% (42%-61%)         | 59            | 15% (12%-19%)         |
|                   | Early Phase 1   | 0        | -                     | 1        | 63% (63%-63%)         | 0             | -                     |
|                   | Phase 1         | 2        | 53% (49%-57%)         | 7        | 65% (63%-75%)         | 4             | 22% (20%-24%)         |
|                   | Phase 1/Phase 2 | 20       | 43% (38%-48%)         | 33       | 52% (42%-66%)         | 15            | 15% (10%-19%)         |
|                   | Phase 2         | 50       | 44% (39%-54%)         | 107      | 51% (43%-58%)         | 40            | 15% (12%-18%)         |
|                   | Phase 2/Phase 3 | 0        | -                     | 0        | -                     | 0             | -                     |
|                   | Phase 3         | 13       | 22% (20%-32%)         | 5        | 24% (20%-31%)         | 0             | -                     |
|                   | Phase 4         | 1        | 47% (47%-47%)         | 0        | -                     | 0             | -                     |
| Moderate          | All             | 15       | 55% (33%-60%)         | 58       | 49% (42%-62%)         | 95            | 16% (12%-20%)         |
|                   | Early Phase 1   | 1        | 100% (100%-100%)      | 0        | -                     | 1             | 37% (37%-37%)         |
|                   | Phase 1         | 0        | -                     | 6        | 52% (49%-76%)         | 3             | 20% (17%-21%)         |
|                   | Phase 1/Phase 2 | 3        | 56% (55%-60%)         | 6        | 47% (44%-51%)         | 7             | 17% (16%-20%)         |
|                   | Phase 2         | 7        | 55% (50%-61%)         | 39       | 52% (42%-76%)         | 80            | 16% (12%-20%)         |
|                   | Phase 2/Phase 3 | 1        | 27% (27%-27%)         | 0        | -                     | 1             | 13% (13%-13%)         |
|                   | Phase 3         | 3        | 29% (29%-31%)         | 3        | 24% (21%-42%)         | 3             | 8% (8%-9%)            |
|                   | Phase 4         | 0        | -                     | 1        | 44% (44%-44%)         | 0             | -                     |
| High              | All             | 2        | 64% (48%-80%)         | 7        | 60% (51%-81%)         | 19            | 19% (15%-25%)         |
|                   | Early Phase 1   | 1        | 96% (96%-96%)         | 1        | 92% (92%-92%)         | 0             | -                     |
|                   | Phase 1         | 0        | -                     | 0        | -                     | 0             | -                     |
|                   | Phase 1/Phase 2 | 0        | -                     | 0        | -                     | 1             | 8% (8%-8%)            |
|                   | Phase 2         | 1        | 33% (33%-33%)         | 4        | 57% (52%-63%)         | 16            | 20% (16%-26%)         |
|                   | Phase 2/Phase 3 | 0        | -                     | 0        | -                     | 0             | -                     |
|                   | Phase 3         | 0        | -                     | 1        | 28% (28%-28%)         | 1             | 15% (15%-15%)         |
|                   | Phase 4         | 0        | -                     | 0        | -                     | 0             | -                     |

Legend

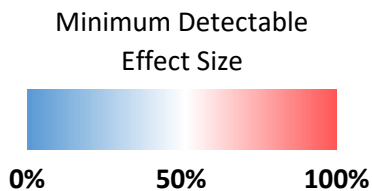

**Supplementary Table S13.** Association between experimental rates of total adverse events and summary measures of efficacy outcomes via linear regression.

| Adverse Event,<br>(Experimental Arm Rate) | Median OS<br>(months),<br>Experimental<br>Arm |         | Median PFS<br>(months),<br>Experimental<br>Arm |              | ORR,<br>Experimental<br>Arm |         |
|-------------------------------------------|-----------------------------------------------|---------|------------------------------------------------|--------------|-----------------------------|---------|
|                                           | $\beta^*$                                     | P value | $\beta$                                        | P value      | $\beta$                     | P value |
| (intercept)                               | 16.801                                        | <0.001  | 24.928                                         | <0.001       | 0.318                       | 0.116   |
| Total SAE                                 | 10.941                                        | 0.477   | -2.040                                         | 0.949        | -0.347                      | 0.621   |
| Total Other AE                            | -0.652                                        | 0.906   | <b>-18.920</b>                                 | <b>0.001</b> | -0.079                      | 0.742   |
| Total Other AE : Total SAE                | -14.717                                       | 0.405   | 5.843                                          | 0.864        | 0.112                       | 0.888   |
| N                                         | 91                                            |         | 81                                             |              | 72                          |         |
| Post Hoc Power** ( $R^2$ )                | 18% ( $R^2 = 0.02$ )                          |         | 74% ( $R^2 = 0.11$ )                           |              | 32% ( $R^2 = 0.05$ )        |         |

\*  $\beta$  = linear regression coefficient. \*\* Power to assess the model's predicted  $R^2$  given number of observations and number of covariates; \*\*\*- = covariate not included due to low data availability; ":" indicates interaction between covariates.



**Supplementary Table S14.** Association between experimental rates of top 3 serious and other adverse events and summary measures of efficacy outcomes via linear regression.

| Adverse Event**** (Experimental Arm Rate) | Median OS (months), Experimental Arm |                  | Median PFS (months), Experimental Arm |                  | ORR, Experimental Arm       |         |
|-------------------------------------------|--------------------------------------|------------------|---------------------------------------|------------------|-----------------------------|---------|
|                                           | $\beta^*$                            | P value          | $\beta$                               | P value          | $\beta$                     | P value |
| (Intercept)                               | 14.384                               | 0.090            | 1.152                                 | 0.65             | -0.006                      | 0.986   |
| Serious Seizure                           | 34.631                               | 0.782            | 24.603                                | 0.303            | 1.663                       | 0.747   |
| Serious Vomiting                          | -26.444                              | 0.947            | -80.974                               | 0.401            | -8.417                      | 0.566   |
| Serious Nausea                            | 27.983                               | 0.925            | <b>436.495</b>                        | <b>0.013</b>     | 6.66                        | 0.749   |
| Serious Seizure : Serious Vomiting        | -6056                                | 0.414            | 1654.72                               | 0.294            | 124.864                     | 0.505   |
| Serious Seizure : Serious Nausea          | 2891.105                             | 0.336            | -1370.46                              | 0.362            | -83.151                     | 0.709   |
| Serious Nausea : Serious Vomiting         | -488.137                             | 0.940            | -5863.97                              | 0.063            | -16.031                     | 0.958   |
| N                                         | 17                                   |                  | 16                                    |                  | 10                          |         |
| Post Hoc Power** (R <sup>2</sup> )        | 60% (R <sup>2</sup> = 0.49)          |                  | 94% (R <sup>2</sup> = 0.71)           |                  | 12% (R <sup>2</sup> = 0.38) |         |
| (Intercept)                               | 32.995                               | <0.001           | 25.848                                | <0.001           | 0.068                       | 0.462   |
| fatigue                                   | <b>-44.856</b>                       | <b>&lt;0.001</b> | <b>-40.529</b>                        | <b>&lt;0.001</b> | 0.096                       | 0.693   |
| nausea                                    | 3.159                                | 0.889            | -0.091                                | 0.997            | -0.529                      | 0.277   |
| vomiting                                  | -69.291                              | 0.194            | -77.126                               | 0.115            | 1.693                       | 0.149   |
| fatigue : nausea                          | -0.917                               | 0.987            | 6.754                                 | 0.893            | 1.233                       | 0.266   |
| fatigue : vomiting                        | 130.416                              | 0.160            | 110.913                               | 0.175            | -2.39                       | 0.199   |
| vomiting : nausea                         | 51.552                               | 0.213            | 64.117                                | 0.090            | -1.103                      | 0.251   |
| N                                         | 55                                   |                  | 51                                    |                  | 48                          |         |
| Post Hoc Power** (R <sup>2</sup> )        | 98% (R <sup>2</sup> = 0.35)          |                  | 97% (R <sup>2</sup> = 0.34)           |                  | 25% (R <sup>2</sup> = 0.08) |         |

\*  $\beta$  = linear regression coefficient. \*\* Power to assess the model's predicted R2 given number of observations and number of covariates; \*\*\*- = covariate not included due to low data availability.

\*\*\*\*Top adverse events reporting sufficient data were selected, among trials reporting data for each efficacy outcome; ":" indicates interaction between covariates.
